# Supplementary material for: Paternal Urinary Concentrations of Parabens and Other Phenols in Relation to Reproductive Outcomes among Couples from a Fertility Clinic
Source: PubMed Central journal article supplement (PMC4492268; doi:10.1289/ehp.1408605), 2015-03-13
Supplement: ehp.1408605.s001.acco.pdf [file ehp.1408605.s001.acco.pdf]

**Note to Readers:** *EHP* strives to ensure that all journal content is accessible to all readers.

However, some figures and Supplemental Material published in *EHP* articles may not conform to 508 standards due to the complexity of the information being presented. If you need assistance accessing journal content, please contact [ehp508@niehs.nih.gov](mailto:ehp508@niehs.nih.gov). Our staff will work with you to assess and meet your accessibility needs within 3 working days.

## **Supplemental Material**

# **Paternal Urinary Concentrations of Parabens and Other Phenols in Relation to Reproductive Outcomes among Couples from a Fertility Clinic**

Laura E. Dodge, Paige L. Williams, Michelle A. Williams, Stacey A. Missmer, Thomas L. Toth, Antonia M. Calafat, and Russ Hauser

### **Table of Contents**

**Table S1.** Distribution of unadjusted and specific gravity (SG)-adjusted paternal urinary phenol concentrations (ng/ml).

**Table S2.** Associations between fertilization rate among initiated cycles and quartiles of geometric means of specific gravity-adjusted urinary phenol concentrations among men whose female partner underwent in vitro fertilization.

**Table S3.** Associations between the proportion of high-quality embryos among initiated cycles and quartiles of specific gravity-adjusted geometric mean urinary phenol concentrations among men whose female partner underwent in vitro fertilization.

**Table S4.** Associations between implantation and quartiles of geometric means of specific gravity-adjusted urinary phenol concentrations among men whose female partner underwent in vitro fertilization.

**Table S1.** Distribution of unadjusted and specific gravity (SG)-adjusted paternal urinary phenol concentrations (ng/ml).

| <b>Concentration</b>                   | <b>All cycles</b>   | <b>Cycle 1</b>     | <b>Cycle 2</b>      | <b>Cycle 3</b>     |
|----------------------------------------|---------------------|--------------------|---------------------|--------------------|
| <b>In vitro fertilization (IVF)</b>    |                     |                    |                     |                    |
| Bisphenol A                            |                     |                    |                     |                    |
| Number of cycles                       | 211                 | 152                | 40                  | 19                 |
| Unadjusted geometric mean              | 1.6 (0.8 – 2.8)     | 1.9 (0.7 – 3.1)    | 1.3 (0.8 – 2.5)     | 1.2 (0.6 – 2.0)    |
| SG-adjusted geometric mean             | 1.8 (1.1 – 2.5)     | 1.9 (1.1 – 2.7)    | 1.8 (1.1 – 2.4)     | 1.7 (1.0 – 2.1)    |
| SG-adjusted concurrent measure         | 1.8 (1.1 – 2.7)     | 1.8 (1.0 – 2.8)    | 1.6 (1.1 – 2.5)     | 2.2 (1.5 – 2.9)    |
| <LOD <sup>a</sup> —n (%)               | 30 (14.2)           | 22 (14.5)          | 5 (12.5)            | 3 (15.8)           |
| Methyl paraben                         |                     |                    |                     |                    |
| Number of cycles                       | 199                 | 143                | 38                  | 18                 |
| Unadjusted geometric mean              | 26.1 (10.3 – 87.5)  | 24.9 (9.5 – 105.0) | 30.7 (11.4 – 81.9)  | 29.0 (10.3 – 70.6) |
| SG-adjusted geometric mean             | 29.3 (10.7 – 108.6) | 29.3 (8.9 – 108.6) | 31.4 (13.3 – 122.0) | 27.7 (16.2 – 94.1) |
| SG-adjusted concurrent measure         | 28.5 (8.3 – 122.3)  | 27.8 (8.1 – 122.3) | 34.4 (14.4 – 101.7) | 35.2 (7.3 – 139.4) |
| <LOD <sup>a</sup> —n (%)               | 2 (1.0)             | 1 (0.7)            | 1 (2.6)             | 0 (0.0)            |
| Propyl paraben                         |                     |                    |                     |                    |
| Number of cycles                       | 199                 | 143                | 38                  | 18                 |
| Unadjusted geometric mean              | 3.4 (0.8 – 15.1)    | 3.1 (0.8 – 16.0)   | 4.1 (0.8 – 12.4)    | 3.3 (1.0 – 8.9)    |
| SG-adjusted geometric mean             | 3.5 (1.0 – 13.9)    | 3.3 (0.8 – 13.9)   | 4.9 (1.0 – 19.6)    | 2.8 (1.5 – 12.9)   |
| SG-adjusted concurrent measure         | 3.3 (0.7 – 20.2)    | 2.9 (0.7 – 20.2)   | 7.4 (0.7 – 47.4)    | 1.9 (0.7 – 9.6)    |
| <LOD <sup>a</sup> —n (%)               | 23 (11.6)           | 18 (12.6)          | 3 (7.9)             | 2 (11.1)           |
| Butyl paraben                          |                     |                    |                     |                    |
| Number of cycles                       | 199                 | 143                | 38                  | 18                 |
| Unadjusted geometric mean              | 0.2 (0.2 – 0.7)     | 0.2 (0.2 – 0.7)    | 0.2 (0.2 – 0.8)     | 0.2 (0.2 – 0.5)    |
| SG-adjusted geometric mean             | 0.4 (0.2 – 1.0)     | 0.3 (0.2 – 1.0)    | 0.4 (0.2 – 0.9)     | 0.3 (0.2 – 0.5)    |
| SG-adjusted concurrent measure         | 0.3 (0.2 – 0.8)     | 0.4 (0.2 – 0.9)    | 0.4 (0.1 – 0.7)     | 0.2 (0.2 – 0.6)    |
| <LOD <sup>a</sup> —n (%)               | 119 (59.8)          | 82 (57.3)          | 25 (65.8)           | 12 (66.7)          |
| <b>Intrauterine insemination (IUI)</b> |                     |                    |                     |                    |
| Bisphenol A                            |                     |                    |                     |                    |
| Number of cycles                       | 195                 | 102                | 66                  | 27                 |
| Unadjusted geometric mean              | 2.0 (1.0 – 3.6)     | 1.8 (0.9 – 3.6)    | 2.1 (1.0 – 3.3)     | 1.8 (1.0 – 3.9)    |
| SG-adjusted geometric mean             | 1.9 (1.2 – 3.0)     | 2.0 (1.0 – 3.0)    | 1.9 (1.2 – 3.1)     | 1.5 (1.3 – 2.9)    |
| SG-adjusted concurrent measure         | 1.8 (1.1 – 3.0)     | 2.0 (1.0 – 3.0)    | 2.1 (1.3 – 3.2)     | 1.6 (1.0 – 2.4)    |
| <LOD <sup>a</sup> —n (%)               | 18 (9.2)            | 11 (10.8)          | 5 (7.6)             | 2 (7.4)            |

| <b>Concentration</b>           | <b>All cycles</b>  | <b>Cycle 1</b>    | <b>Cycle 2</b>      | <b>Cycle 3</b>     |
|--------------------------------|--------------------|-------------------|---------------------|--------------------|
| <b>Methyl paraben</b>          |                    |                   |                     |                    |
| Number of cycles               | 182                | 96                | 62                  | 25                 |
| Unadjusted geometric mean      | 24.9 (9.3 – 85.6)  | 22.7 (8.2 – 84.8) | 26.9 (10.0 – 101.9) | 24.4 (13.3 – 92.9) |
| SG-adjusted geometric mean     | 25.5 (10.9 – 78.2) | 21.8 (9.4 – 80.0) | 29.1 (11.5 – 80.8)  | 32.5 (13.8 – 61.7) |
| SG-adjusted concurrent measure | 23.1 (9.4 – 78.3)  | 21.8 (9.4 – 80.0) | 20.2 (9.4 – 73.3)   | 31.2 (9.6 – 145.4) |
| <LOD <sup>a</sup> —n (%)       | 2 (1.1)            | 2 (2.1)           | 0 (0.0)             | 0 (0.0)            |
| <b>Propyl paraben</b>          |                    |                   |                     |                    |
| Number of cycles               | 182                | 96                | 62                  | 25                 |
| Unadjusted geometric mean      | 2.7 (0.9 – 11.3)   | 2.4 (0.9 – 9.7)   | 3.3 (0.9 – 11.6)    | 3.2 (1.6 – 15.0)   |
| SG-adjusted geometric mean     | 2.7 (0.9 – 15.5)   | 2.6 (0.9 – 12.2)  | 3.9 (0.9 – 11.4)    | 2.9 (1.3 – 19.0)   |
| SG-adjusted concurrent measure | 2.7 (0.8 – 19.4)   | 2.6 (0.9 – 12.2)  | 2.8 (0.7 – 21.6)    | 8.5 (0.8 – 26.7)   |
| <LOD <sup>a</sup> —n (%)       | 17 (9.3)           | 9 (9.4)           | 5 (8.1)             | 3 (12.5)           |
| <b>Butyl paraben</b>           |                    |                   |                     |                    |
| Number of cycles               | 182                | 96                | 62                  | 25                 |
| Unadjusted geometric mean      | 0.2 (0.2 – 0.3)    | 0.2 (0.2 – 0.3)   | 0.2 (0.2 – 0.4)     | 0.2 (0.2 – 0.7)    |
| SG-adjusted geometric mean     | 0.2 (0.2 – 0.6)    | 0.2 (0.2 – 0.5)   | 0.2 (0.2 – 0.5)     | 0.3 (0.2 – 0.6)    |
| SG-adjusted concurrent measure | 0.2 (0.2 – 0.6)    | 0.2 (0.2 – 0.5)   | 0.2 (0.2 – 0.6)     | 0.2 (0.1 – 0.5)    |
| <LOD <sup>a</sup> —n (%)       | 122 (66.7)         | 64 (66.7)         | 42 (67.7)           | 16 (66.7)          |

Data are presented as median and interquartile range of the geometric mean of all urinary phenol measurements up to and including the cycle of interest; IVF, in vitro fertilization; LOD, limit of detection; IUI, intrauterine insemination

<sup>a</sup>The LOD for bisphenol A was 0.36-0.40 ng/ml, the LOD for methyl paraben was 1.0 ng/ml, and the LODs for propyl and butyl paraben were 0.2 ng/ml

**Table S2.** Associations between fertilization rate among initiated cycles and quartiles of geometric means of specific gravity-adjusted urinary phenol concentrations among men whose female partner underwent in vitro fertilization.

| Phenol quartiles<br>(range in ng/ml) | N   | Unadjusted<br>RR (95% CI) | Confounder-adjusted <sup>a</sup><br>aRR (95% CI) |
|--------------------------------------|-----|---------------------------|--------------------------------------------------|
| <b>Bisphenol A</b>                   | 211 |                           |                                                  |
| 1 ( $\leq 1.05$ )                    | 53  | 1.00                      | 1.00                                             |
| 2 (1.06 – 1.81)                      | 53  | 1.37 (0.91, 2.06)         | 1.37 (0.90, 2.06)                                |
| 3 (1.82 – 2.52)                      | 52  | 1.24 (0.82, 1.88)         | 1.24 (0.82, 1.89)                                |
| 4 (2.53 – 22.91)                     | 53  | 1.20 (0.79, 1.82)         | 1.20 (0.79, 1.82)                                |
| <b>P-trend<sup>b</sup></b>           |     | 0.72                      | 0.72                                             |
| <b>Methyl paraben</b>                | 199 |                           |                                                  |
| 1 ( $\leq 10.46$ )                   | 51  | 1.00                      | 1.00                                             |
| 2 (10.47 – 28.95)                    | 48  | 1.18 (0.78, 1.79)         | 1.18 (0.77, 1.80)                                |
| 3 (28.96 – 109)                      | 51  | 1.46 (0.95, 2.25)         | 1.46 (0.95, 2.25)                                |
| 4 (109 – 2,862)                      | 49  | 0.99 (0.64, 1.54)         | 0.99 (0.64, 1.55)                                |
| <b>P-trend<sup>b</sup></b>           |     | 0.51                      | 0.52                                             |
| <b>Propyl paraben</b>                | 199 |                           |                                                  |
| 1 ( $\leq 0.99$ )                    | 50  | 1.00                      | 1.00                                             |
| 2 (1.00 – 3.47)                      | 49  | 1.13 (0.74, 1.74)         | 1.13 (0.74, 1.75)                                |
| 3 (3.48 – 13.93)                     | 51  | 1.07 (0.70, 1.64)         | 1.07 (0.69, 1.64)                                |
| 4 (13.94 – 842)                      | 49  | 0.99 (0.64, 1.53)         | 0.99 (0.64, 1.53)                                |
| <b>P-trend<sup>b</sup></b>           |     | 0.68                      | 0.69                                             |
| <b>Butyl paraben</b>                 | 199 |                           |                                                  |
| Below the LOD <sup>c</sup>           | 119 | 1.00                      | 1.00                                             |
| Above the LOD <sup>c</sup>           | 80  | 1.00 (0.75, 1.34)         | 1.00 (0.75, 1.35)                                |
| <b>P<sup>d</sup></b>                 |     | 0.97                      | 0.98                                             |

Fertilization rate was defined as the number of oocytes with two pronuclei divided by the number of mature metaphase II oocytes; IVF, in vitro fertilization; RR, rate ratio; CI, confidence interval; LOD, limit of detection.

<sup>a</sup>All models were adjusted for maternal age (years); no other confounders met the inclusion criteria for any model. <sup>b</sup>The p-trend value was calculated using the median of each quartile as a continuous variable.

<sup>c</sup>The LOD for butyl paraben was 0.2 ng/ml. <sup>d</sup>The p-value was calculated using above and below the LOD as categorical variables.

No mediators met the inclusion criteria for any model, therefore we present a model adjusted for confounders only.

**Table S3.** Associations between the proportion of high-quality embryos among initiated cycles and quartiles of specific gravity-adjusted geometric mean urinary phenol concentrations among men whose female partner underwent in vitro fertilization.

| Phenol quartiles (range in ng/ml) | N   | Unadjusted RR (95% CI) | Confounder-adjusted <sup>a</sup> aRR (95% CI) |
|-----------------------------------|-----|------------------------|-----------------------------------------------|
| <b>Bisphenol A</b>                | 211 |                        |                                               |
| 1 ( $\leq 1.05$ )                 | 53  | 1.00                   | 1.00                                          |
| 2 (1.06–1.81)                     | 53  | 1.91 (1.12, 3.25)      | 1.92 (1.13, 3.25)                             |
| 3 (1.82–2.52)                     | 52  | 1.31 (0.76, 2.28)      | 1.36 (0.79, 2.36)                             |
| 4 (2.53–22.91)                    | 53  | 1.24 (0.71, 2.15)      | 1.26 (0.73, 2.18)                             |
| <b>P-trend<sup>b</sup></b>        |     | 0.80                   | 0.85                                          |
| <b>Methyl paraben</b>             | 199 |                        |                                               |
| 1 ( $\leq 10.46$ )                | 49  | 1.00                   | 1.00                                          |
| 2 (10.47–28.95)                   | 50  | 1.20 (0.70, 2.08)      | 1.14 (0.66, 1.98)                             |
| 3 (28.96–109)                     | 51  | 1.33 (0.76, 2.33)      | 1.34 (0.76, 2.34)                             |
| 4 (109–2,862)                     | 49  | 1.05 (0.58, 1.91)      | 1.08 (0.60, 1.95)                             |
| <b>P-trend<sup>b</sup></b>        |     | 0.79                   | 0.94                                          |
| <b>Propyl paraben</b>             | 199 |                        |                                               |
| 1 ( $\leq 0.99$ )                 | 51  | 1.00                   | 1.00                                          |
| 2 (1.00–3.47)                     | 48  | 1.14 (0.65, 2.01)      | 1.16 (0.66, 2.04)                             |
| 3 (3.48–13.93)                    | 51  | 0.75 (0.44, 1.32)      | 0.77 (0.44, 1.35)                             |
| 4 (13.94–842)                     | 49  | 0.99 (0.55, 1.79)      | 1.10 (0.61, 1.98)                             |
| <b>P-trend</b>                    |     | 0.90                   | 0.64                                          |
| <b>Butyl paraben</b>              | 199 |                        |                                               |
| Below the LOD <sup>c</sup>        | 119 | 1.00                   | 1.00                                          |
| Above the LOD <sup>c</sup>        | 80  | 1.22 (0.84, 1.78)      | 1.25 (0.85, 1.82)                             |
| <b>P<sup>d</sup></b>              |     | 0.29                   | 0.25                                          |

RR, rate ratio; aRR, adjusted rate ratio; CI, confidence interval; LOD, limit of detection.

<sup>a</sup>All models were adjusted for maternal age (years) and paternal normal weight (vs. overweight and obese); maternal normal weight (vs. overweight and obese) was additionally adjusted for in the models for bisphenol A and methyl and propyl paraben; maternal smoking (ever vs. never) was additionally adjusted for in the model for bisphenol A. <sup>b</sup>The p-trend value was calculated using the median of each quartile as a continuous variable. <sup>c</sup>The LOD for butyl paraben was 0.2 ng/ml. <sup>d</sup>The p-value was calculated using above and below the LOD as categorical variables.

No mediator met the inclusion criteria for any model, therefore we present a model adjusted for confounders only.

**Table S4.** Associations between implantation and quartiles of geometric means of specific gravity-adjusted urinary phenol concentrations among men whose female partner underwent in vitro fertilization.

| Phenol quartiles (range in ng/ml) | N   | Unadjusted OR (95% CI) | Confounder-adjusted <sup>a</sup> aOR (95% CI) | Confounder- and mediator-adjusted <sup>b</sup> aOR (95% CI) |
|-----------------------------------|-----|------------------------|-----------------------------------------------|-------------------------------------------------------------|
| <b>Bisphenol A</b>                | 192 |                        |                                               |                                                             |
| 1 ( $\leq 1.05$ )                 | 43  | 1.00                   | 1.00                                          | NA <sup>d</sup>                                             |
| 2 (1.06 – 1.81)                   | 51  | 1.03 (0.41, 2.57)      | 1.05 (0.41, 2.69)                             | NA <sup>d</sup>                                             |
| 3 (1.82 – 2.51)                   | 49  | 1.02 (0.40, 2.61)      | 1.02 (0.39, 2.68)                             | NA <sup>d</sup>                                             |
| 4 (2.52 – 22.91)                  | 49  | 2.06 (0.77, 5.51)      | 2.37 (0.85, 6.61)                             | NA <sup>d</sup>                                             |
| <b>P-trend<sup>c</sup></b>        |     | 0.11                   | 0.07                                          | NA <sup>d</sup>                                             |
| <b>Methyl paraben</b>             | 182 |                        |                                               |                                                             |
| 1 ( $\leq 10.46$ )                | 47  | 1.00                   | 1.00                                          | 1.00                                                        |
| 2 (10.47 – 29.38)                 | 45  | 0.31 (0.12, 0.84)      | 0.42 (0.14, 1.26)                             | 0.38 (0.13, 1.16)                                           |
| 3 (29.39 – 109)                   | 44  | 0.72 (0.26, 1.98)      | 0.86 (0.29, 2.53)                             | 0.86 (0.29, 2.54)                                           |
| 4 (109 – 2,862)                   | 46  | 0.50 (0.18, 1.36)      | 0.55 (0.19, 1.61)                             | 0.53 (0.18, 1.55)                                           |
| <b>P-trend<sup>c</sup></b>        |     | 0.70                   | 0.59                                          | 0.57                                                        |
| <b>Propyl paraben</b>             | 182 |                        |                                               |                                                             |
| 1 ( $\leq 0.99$ )                 | 46  | 1.00                   | 1.00                                          | 1.00                                                        |
| 2 (1.00 – 3.47)                   | 46  | 0.81 (0.30, 2.19)      | 1.02 (0.36, 2.87)                             | 1.11 (0.37, 3.27)                                           |
| 3 (3.48 – 13.93)                  | 44  | 0.63 (0.24, 1.62)      | 0.77 (0.28, 2.11)                             | 0.76 (0.26, 2.17)                                           |
| 4 (13.94 – 842)                   | 46  | 1.01 (0.37, 2.75)      | 0.95 (0.34, 2.67)                             | 0.98 (0.33, 2.95)                                           |
| <b>P-trend<sup>c</sup></b>        |     | 0.62                   | 0.98                                          | 0.95                                                        |
| <b>Butyl paraben</b>              | 182 |                        |                                               |                                                             |
| Below the LOD <sup>e</sup>        | 112 | 1.00                   | 1.00                                          | 1.00                                                        |
| Above the LOD <sup>e</sup>        | 70  | 0.69 (0.35, 1.36)      | 0.75 (0.36, 1.57)                             | 0.67 (0.31, 1.42)                                           |
| <b>P<sup>f</sup></b>              |     | 0.28                   | 0.44                                          | 0.29                                                        |

OR, odds ratio; aOR, adjusted odds ratio; CI, confidence interval; LOD, limit of detection.

<sup>a</sup>All models are adjusted for maternal age (years) and overall cycle number; paternal age (years) was additionally adjusted for in the models for methyl and butyl paraben; maternal smoking (ever vs. never) was additionally adjusted for in the models for methyl, propyl, and butyl paraben. <sup>b</sup>All models were adjusted for all variables listed above; any diagnosis of male factor infertility (yes vs. no) was additionally adjusted for in the models for propyl paraben; stimulation protocol (luteal phase vs. flare/antagonist) and the use of ICSI (yes vs. no) were additionally adjusted for in the models for methyl, propyl, and butyl paraben. <sup>c</sup>The p-trend value was calculated using the median of each quartile as a continuous variable. <sup>d</sup>No mediator met the inclusion criteria for any model, therefore we present a model adjusted for confounders only. <sup>e</sup>The LOD for butyl paraben was 0.2 ng/ml. <sup>f</sup>The p-value was calculated using above and below the LOD as categorical variables.
